# Supplementary material
Source: MDPI journal article supplement (https://www.mdpi.com/2071-1050/15/14/11457)
Supplement: s1 [file s1 › sustainability-2446899-supplementary.pdf]

## 1. Introduction to the Developed Software

A computer software is developed in Visual Studio (version 2010) [62] using Vb.net programming language to perform the analysis, design and cost optimization of prestressed U-shaped girder. The general tab, dimension tab and initial design tab of developed software is shown in **Figure S1** through **Figure S4** respectively and can be found in the appendix section. In the general tab and dimension tab there are text boxes for material properties, initial design variables and for explicit constraints limits. In the initial design tab, analysis and design checks are performed for initial design in order to start optimization process efficiently. Also the optimum results after successful iteration in a program is shown in **Figure S5**.

The screenshot displays the 'General' tab of the U\_TUB software. It features input fields for material properties, prestressing strands, and reinforcement. The cross-section diagram shows a U-shaped girder with dimensions labeled X1 through X7.

| Material Properties | Prestressing strands     |
|---------------------|--------------------------|
| Concrete            |                          |
| $f_c' = 45$ MPa     | $\text{dia} = 15.24$ MPa |
| $f_{ci} = 35$ MPa   | Unit Area = 140 MPa      |
|                     | $E_p = 196500$ MPa       |
|                     | $f_{pu} = 1860$ MPa      |

  

| Reinforcement      |
|--------------------|
| $f_y = 420$ MPa    |
| $E_s = 200000$ MPa |

The cross-section diagram shows a U-shaped girder with dimensions labeled X1 through X7. X1 is the top flange width, X2 is the top flange thickness, X3 is the web thickness, X4 is the web height, X5 is the bottom flange width, X6 is the bottom flange thickness, and X7 is the bottom flange height.

**Figure S1.** General view of developed software.

U\_TUB

General Dimensions Initial Design Unit Cost Optimum Cost and variables Top flexure stress at transfer vs Iteration Bottom flexure stresses Vs Iteration Top flexure stresses at service Vs Iteration Bottom fle

| Initial design variables |         | Explicit Constraints |             |
|--------------------------|---------|----------------------|-------------|
| X1 =                     | 690 mm  | 550                  | < X1 > 700  |
| X2 =                     | 345 mm  | 250                  | < X2 > 350  |
| X3 =                     | 345 mm  | 275                  | < X3 > 350  |
| X4 =                     | 1190 mm | 1150                 | < X4 > 1300 |
| X5 =                     | 440 mm  | 300                  | < X5 > 450  |
| X6 =                     | 245 mm  | 150                  | < X6 > 250  |
| X7 =                     | 350 mm  | 275                  | < X7 > 400  |
| X8 =                     | 34 mm   | 20                   | < X8 > 35   |
| X9 =                     | 84 mm   | 50                   | < X9 > 85   |

Where as X8 is the No of steel bars  
Where as X9 is the No of Strands

Figure S2. Tab for Initial design variables and explicit constraints.

U\_TUB

General Dimensions Initial Design Unit Cost Optimum Cost and variables Top flexure stress at transfer vs Iteration Bottom flexure stresses Vs Iteration Top flexure stresses at service Vs Iteration Bottom fle

Analysis Checks

Analysis and results

Top flexure stresses at transfer =  MPa

bottom flexure stresses at transfer =  MPa

Top flexure stresses at service =  MPa

Bottom flexure stresses at service =  MPa

Moment capacity Mn =  N-mm

Shear Capacity Vn =  N

Figure S3. Button for initial design analysis and results.

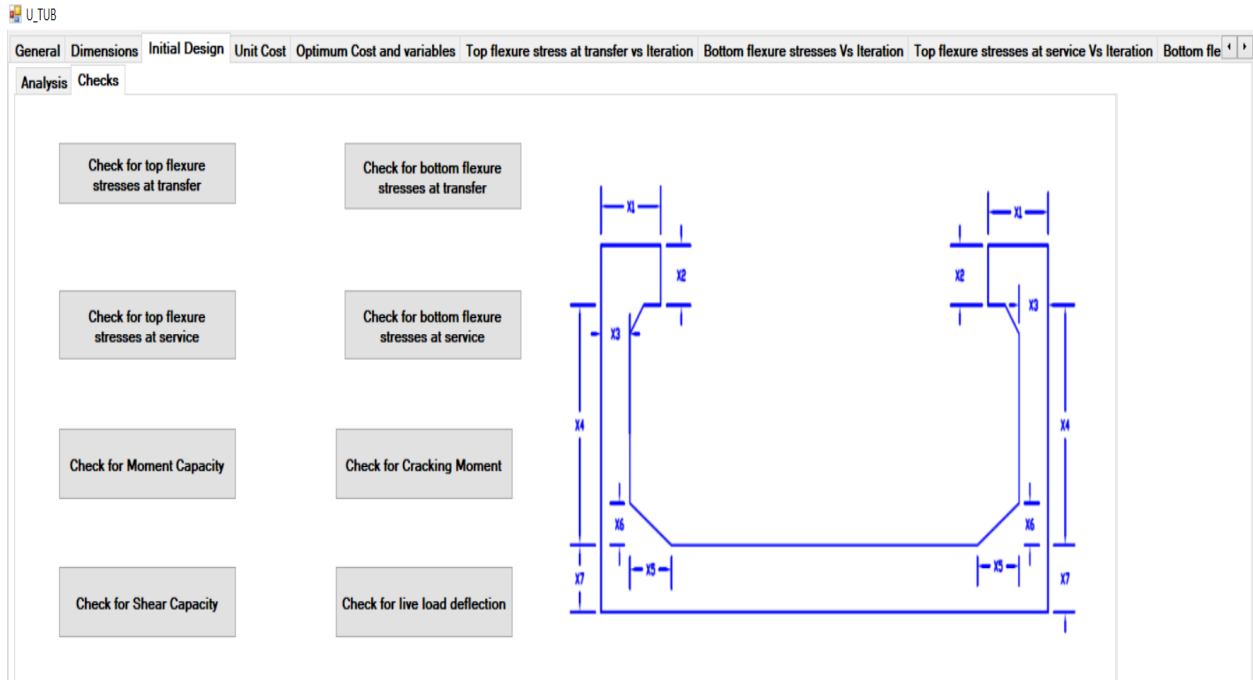

Figure S4. Different buttons for initial design checks.

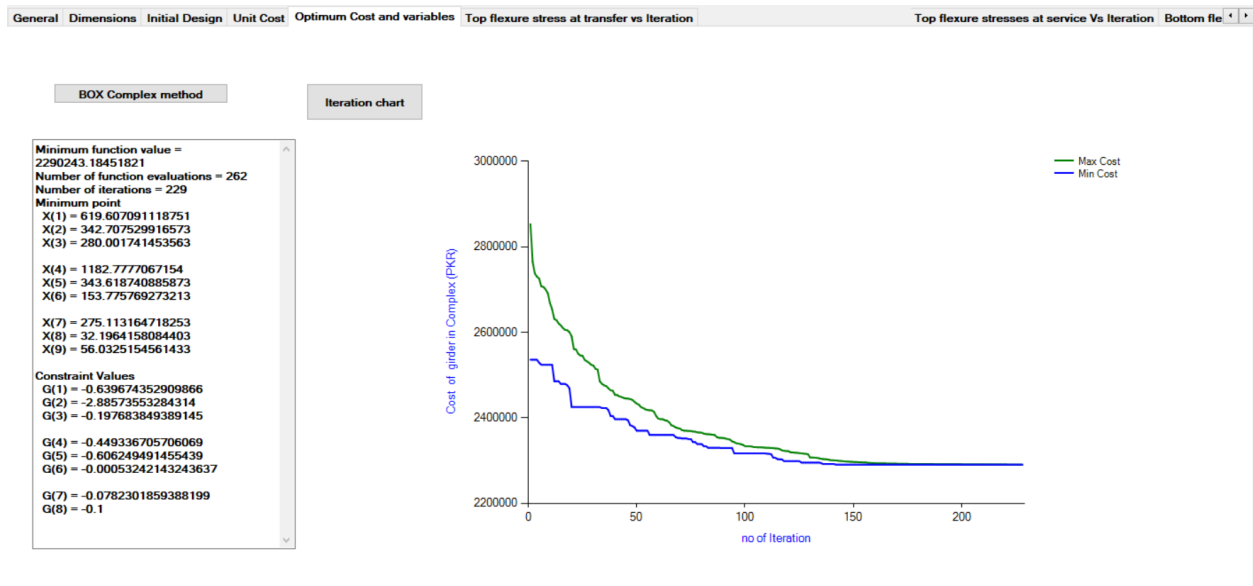

Figure S5. Optimum design result in the developed Software.
